# Supplementary material for: Colloidal and chemical stabilities of iron oxide nanoparticles in aqueous solutions: the interplay of structural, chemical and environmental drivers
Source: Royal Society of Chemistry journal article supplement (doi:10.1039/c7en01159h), 2018-01-01
Supplement: c7en01159h1.xlsx [file c7en01159h1.xlsx]

## Sheet: SD-diagrams (nb)
Figures S1:
a.)	Magnetite
b.)	Magnetite-HA
c.)	Magnetite-PC
d.)	Maghemite
e.)	Hematite

## Sheet: Occ rates - Tables
Tables S1:
Caption:
Occurrence rates measeured on each detector from laser particle size analyses
		>5%
		>1%
		0.1-1%
		0-0.1%
Magnetite
size (µm)	0.04	0.07	0.1	0.2	0.3	0.4	0.5	0.6	0.7	0.8	0.9	1	1.1	1.2	1.3	1.4	1.6	1.8	2	2.2	2.4	2.6	3	4	5	6	6.5	7	7.5	8	8.5	9	10	11	12	13	14	15	16	17	18	19	20	22	25	28	32
pH 7.5	43.16	11.17	11.26	3.72	6.24	3.38	0.00	0.00	0.00	0.00	0.00	0.00	0.00	0.00	0.00	0.00	0.21	0.73	1.17	1.68	2.16	2.62	1.49	0.64	0.68	0.61	1.23	1.12	1.07	1.00	0.97	0.92	0.41	0.39	0.32	0.31	0.25	0.22	0.19	0.15	0.16	0.11	0.12	0.03	0.02	0.00	0.02
pH 6	43.25	11.11	11.16	3.70	6.23	3.35	0.00	0.00	0.00	0.00	0.00	0.00	0.00	0.00	0.00	0.00	0.28	0.84	1.32	1.78	2.19	2.58	1.44	0.61	0.62	0.59	1.15	1.12	1.03	1.00	1.02	0.92	0.41	0.39	0.32	0.31	0.25	0.22	0.19	0.15	0.16	0.11	0.12	0.03	0.02	0.00	0.023
pH5	64.20	9.69	6.23	1.68	2.95	1.61	0.00	0.00	0.00	0.00	0.00	0.00	0.00	0.00	0.00	0.00	0.14	0.44	0.69	0.89	1.11	1.32	0.76	0.35	0.42	0.41	0.91	0.90	0.83	0.84	0.80	0.74	0.34	0.32	0.24	0.23	0.20	0.17	0.14	0.1	0.11	0.11	0.06	0.03	0.00	0.03	0.00
pH4	62.29	9.39	5.98	1.68	3.02	1.64	0.00	0.00	0.00	0.00	0.00	0.00	0.00	0.00	0.00	0.00	0.16	0.50	0.73	1.00	1.195	1.48	0.85	0.39	0.48	0.50	1.11	1.04	1.08	1.01	0.98	0.93	0.42	0.37	0.34	0.26	0.28	0.17	0.18	0.15	0.10	0.11	0.06	0.06	0.00	0.03	0.00
pH3	62.18	9.37	5.98	1.69	3.05	1.65	0.00	0.00	0.00	0.00	0.00	0.00	0.00	0.00	0.00	0.00	0.16	0.48	0.73	0.97	1.23	1.48	0.85	0.41	0.51	0.52	1.11	1.08	1.076	1.01	1.03	0.93	0.42	0.37	0.31	0.30	0.24	0.17	0.18	0.15	0.10	0.11	0.06	0.06	0.00	0.03	0.00
Magnetite-HA
size (µm)	0.04	0.07	0.1	0.2	0.3	0.4	0.5	0.6	0.7	0.8	0.9	1	1.1	1.2	1.3	1.4	1.6	1.8	2	2.2	2.4	2.6	3	4	5	6	6.5	7	7.5	8	8.5	9	10	11	12	13	14	15	16	17	18	19
pH7.5	58.55	9.99	7.54	1.85	2.98	2.09	1.07	0.84	0.86	1.08	1.15	1.23	1.23	1.32	1.32	1.34	0.68	0.69	0.69	0.73	0.69	0.68	0.32	0.09	0.08	0.07	0.11	0.12	0.13	0.09	0.1	0.05	0.06	0.03	0.03	0.00	0.04	0.00	0.00	0.05	0.00	0.00
pH6	60.37	10.23	7.66	1.86	2.99	2.04	0.97	0.72	0.73	0.92	1.01	1.05	1.09	1.13	1.15	1.16	0.57	0.60	0.64	0.61	0.63	0.61	0.28	0.08	0.07	0.05	0.11	0.12	0.09	0.09	0.1	0.05	0.03	0.03	0.03	0.00	0.04	0.00	0.00	0.05	0.00	0.00
pH5	58.98	10.10	7.66	1.87	3.02	2.11	1.09	0.83	0.85	1.02	1.11	1.18	1.18	1.22	1.25	1.27	0.61	0.64	0.66	0.67	0.66	0.64	0.30	0.08	0.08	0.07	0.11	0.12	0.09	0.09	0.1	0.1	0.03	0.03	0.03	0.00	0.04	0.00	0.00	0.00	0.05	0.00
pH4	58.39	10.04	7.63	1.87	3.01	2.13	1.11	0.86	0.90	1.09	1.15	1.20	1.27	1.25	1.32	1.30	0.66	0.67	0.69	0.70	0.69	0.68	0.30	0.09	0.08	0.07	0.11	0.12	0.13	0.09	0.1	0.05	0.06	0.03	0	0.04	0	0.04	0.00	0.00	0.05	0.00
pH3	44.90	12.62	13.37	4.06	6.47	3.61	0.00	0.00	0.00	0.00	0.00	0.00	0.41	0.64	0.90	1.15	0.76	1.06	1.24	1.48	1.62	1.72	0.87	0.31	0.26	0.23	0.41	0.35	0.33	0.25	0.27	0.23	0.09	0.07	0.07	0.04	0.04	0.05	0.05	0.00	0.00	0.06
Magnetite-PC
size (µm)	0.04	0.07	0.1	0.2	0.3	0.4	0.5	0.6	0.7	0.8	0.9	1	1.1	1.2	1.3	1.4	1.6	1.8	2	2.2	2.4	2.6	3	4	5	6	6.5	7	7.5	8	8.5	9	10	11	12	13	14	15	16	17	18	19	20	22	25	28	32	36	38
pH7.5	43.69	11.13	11.08	3.78	6.50	3.56	0.00	0.00	0.00	0.00	0.00	0.00	0.00	0.11	0.27	0.46	0.49	0.92	1.33	1.73	2.11	2.49	1.39	0.63	0.67	0.614	1.17	1.05	0.99	0.87	0.77	0.76	0.29	0.23	0.21	0.15	0.13	0.09	0.1	0.051	0.05	0.06	0.00	0.00	0.02	0.00	0.00	0.00	0.00
pH6	63.10	9.63	6.30	1.65	2.86	1.61	0.00	0.00	0.00	0.00	0.00	0.00	0.09	0.24	0.37	0.57	0.45	0.71	0.94	1.16	1.38	1.57	0.84	0.34	0.39	0.36	0.75	0.73	0.65	0.70	0.59	0.58	0.26	0.22	0.21	0.15	0.12	0.09	0.09	0.1	0.05	0.00	0.06	0.00	0.00	0.00	0.00	0.00	0.00
pH5	63.10	9.63	6.30	1.65	2.86	1.61	0.00	0.00	0.00	0.00	0.00	0.00	0.09	0.24	0.37	0.57	0.45	0.71	0.94	1.16	1.38	1.57	0.84	0.34	0.39	0.36	0.75	0.73	0.65	0.7	0.59	0.58	0.26	0.22	0.21	0.15	0.12	0.09	0.09	0.1	0.05	0.00	0.06	0.00	0.00	0.00	0.00	0.00	0.00
pH4	44.93	11.23	11.07	3.81	6.56	3.52	0.00	0.00	0.00	0.00	0.00	0.00	0.00	0.00	0.00	0.00	0.28	0.88	1.19	1.54	1.76	1.99	1.05	0.40	0.42	0.43	0.90	0.89	0.91	0.92	0.93	0.98	0.44	0.43	0.39	0.39	0.34	0.27	0.29	0.21	0.22	0.17	0.12	0.03	0.02	0.03	0.00	0.00	0.00
pH3	44.80	11.10	10.86	3.79	6.57	3.53	0.00	0.00	0.00	0.00	0.00	0.00	0.00	0.00	0.00	0.00	0.30	0.90	1.24	1.57	1.86	2.06	1.09	0.41	0.45	0.44	0.93	0.92	0.95	0.96	0.97	0.98	0.44	0.42	0.39	0.39	0.29	0.32	0.24	0.20	0.16	0.17	0.12	0.03	0.02	0.03	0.00	0.00	0.00
Maghemite
size (µm)	0.04	0.07	0.1	0.2	0.3	0.4	0.5	0.6	0.7	0.8	0.9	1	1.1	1.2	1.3	1.4	1.6	1.8	2	2.2	2.4	2.6	3	4	5	6	6.5	7	7.5	8	8.5	9	10	11	12	13	14	15	16	17	18	19	20	22	25	28	32
pH7.5	31.44	10.85	6.55	2.02	4.31	2.31	0.00	0.00	0.00	0.00	0.00	0.00	0.00	0.00	0.00	0.00	0.11	0.31	0.56	0.83	1.14	1.33	0.80	0.41	0.69	0.99	2.60	2.87	3.19	3.45	3.76	3.90	1.93	1.90	1.85	1.76	1.57	1.44	1.23	1.10	0.91	0.78	0.68	0.23	0.1	0.07	0.02
pH6	65.68	9.97	6.45	1.70	2.96	1.63	0.00	0.00	0.00	0.00	0.00	0.00	0.00	0.00	0.00	0.00	0.07	0.18	0.26	0.38	0.42	0.50	0.28	0.12	0.18	0.23	0.65	0.74	0.80	0.90	0.96	1.02	0.49	0.51	0.46	0.46	0.41	0.35	0.28	0.30	0.21	0.17	0.18	0.032	0.02	0.03	0.00
pH5	0.00	0.00	0.00	0.00	0.00	0.00	1.67	1.12	0.19	0.00	0.00	0.00	1.28	1.90	2.43	2.87	1.63	2.00	2.41	2.77	3.33	3.96	2.35	1.37	2.28	2.96	7.16	7.45	7.61	7.68	7.65	7.50	3.35	3	2.59	2.21	1.82	1.48	1.17	0.91	0.73	0.54	0.43	0.13	0.04	0.02	0.00
pH4	0.00	0.00	0.00	0.00	0.00	0.00	2.07	1.45	0.36	0.00	0.00	0.00	1.32	1.96	2.49	2.92	1.64	2.03	2.49	2.95	3.66	4.50	2.76	1.62	2.57	3.16	7.39	7.51	7.54	7.45	7.29	7.03	3.09	2.71	2.28	1.86	1.50	1.20	0.96	0.74	0.58	0.44	0.33	0.1	0.03	0.01	0.00
pH3	0.00	0.00	0.00	0.00	0.00	0.00	1.86	1.35	0.41	0.00	0.00	0.00	1.03	1.60	2.13	2.61	1.58	2.10	2.66	3.22	3.94	4.72	2.78	1.53	2.36	2.96	7.06	7.29	7.42	7.45	7.40	7.23	3.24	2.89	2.46	2.04	1.66	1.33	1.08	0.85	0.67	0.50	0.38	0.12	0.03	0.02	0.00
Hematite
size (µm)	0.04	0.07	0.1	0.2	0.3	0.4	0.5	0.6	0.7	0.8	0.9	1	1.1	1.2	1.3	1.4	1.6	1.8	2	2.2	2.4	2.6	3	4	5	6	6.5	7	7.5	8	8.5	9	10	11	12	13	14	15
pH7.5	2.11	0.55	0.50	0.35	0.94	1.39	1.98	2.81	3.75	5.05	6.25	7.42	8.63	9.40	9.92	10.22	4.87	4.86	4.71	4.55	4.19	3.75	1.40	0.26	0.09	0.02	0.00	0.00	0.00	0.00	0.00	0.00	0.00	0.00	0.00	0.00	0.00	0.00
pH6	45.69	12.69	13.40	3.97	6.24	3.36	0.00	0.00	0.00	0.15	0.42	0.65	0.89	1.13	1.35	1.55	0.88	1.03	1.15	1.27	1.28	1.35	0.62	0.19	0.15	0.09	0.12	0.09	0.09	0.051	0.05	0.06	0.00	0.03	0.00	0.00	0.00	0.00
pH5	45.38	12.89	13.73	4.08	6.42	3.56	0.00	0.00	0.00	0.00	0.00	0.00	0.35	0.61	0.87	1.11	0.77	1.09	1.29	1.49	1.67	1.73	0.85	0.29	0.22	0.18	0.33	0.27	0.19	0.20	0.16	0.12	0.06	0.03	0.04	0.00	0.00	0.00
pH4	45.04	12.56	13.25	4.02	6.40	3.53	0.00	0.00	0.00	0.00	0.00	0.00	0.24	0.45	0.69	1.01	0.73	1.11	1.39	1.64	1.84	2.04	1.00	0.35	0.32	0.25	0.41	0.40	0.33	0.30	0.22	0.23	0.06	0.069	0.04	0.00	0.04	0.00
pH3	42.05	11.76	12.41	3.84	6.22	3.50	0.00	0.00	0.00	0.00	0.00	0.00	0.53	0.83	1.13	1.48	0.99	1.33	1.61	1.84	2.09	2.27	1.16	0.44	0.42	0.38	0.70	0.59	0.59	0.49	0.46	0.38	0.18	0.1	0.11	0.04	0.04	0.04
[truncated: 5 more columns]
